Anesthesiology  
1998; 88:775-80  
© 1998 American Society of Anesthesiologists, Inc.  
Lippincott-Raven Publishers

## Anesthesia Sensitivity in Mice that Lack the $\beta 3$ Subunit of the $\gamma$ -Aminobutyric Acid Type A Receptor

Joseph J. Quinlan, M.D.,\* Gregg E. Homanics, Ph.D.,† Leonard L. Firestone, M.D.‡

**Background:** The mammalian  $\gamma$ -aminobutyric acid type A (GABA<sub>A</sub>) receptor, a likely target of anesthetic action, exhibits remarkable subunit heterogeneity. *In vitro* expression studies suggest that there is subunit specificity to anesthetic responses at the GABA<sub>A</sub> receptor. The authors tested whether genetically engineered mice that lack the  $\beta 3$  subunit of the GABA<sub>A</sub> receptor differed in their sensitivities to several general anesthetic agents.

**Methods:** Median effective concentrations for loss-of-righting reflex and tail clamp/withdrawal for enflurane and halothane were determined in mice with and without the  $\beta 3$  gene and gene product. Sleep time was measured after intraperitoneal injection of pentobarbital, ethanol, etomidate, and midazolam.

**Results:** Null allele mice ( $\beta 3$  -/-) did not differ from wild-type mice ( $\beta 3$  +/+) in the obtunding response to enflurane and halothane but were significantly more resistant to enflurane (null allele half-effect concentrations [EC<sub>50</sub>] of  $2.59 \pm 0.10$  vs. wild-type EC<sub>50</sub> of  $2.06 \pm 0.12$  atm %,  $P < 0.001$ ) and halothane (null allele EC<sub>50</sub> of  $1.73 \pm 0.04$  vs. wild-type EC<sub>50</sub> of  $1.59 \pm 0.05$  atm %,  $P = 0.01$ ) as determined by tail clamp response.

Wild-type and null allele mice exhibited divergent responses to other sedative agents active at the GABA<sub>A</sub> receptor. No differences were noted in sleep times after administration of pentobarbital and ethanol, but null allele mice were more resistant to etomidate (null allele EC<sub>50</sub> of  $17.8 \pm 1.9$  min vs. wild-type EC<sub>50</sub> of  $26.2 \pm 2.4$  min,  $P < 0.02$ ) and midazolam (null allele EC<sub>50</sub> of  $14.2 \pm 7.8$  min vs. wild-type EC<sub>50</sub> of  $41.3 \pm 10.4$  min,  $P < 0.05$ ).

**Conclusions:** The  $\beta 3$  subunit of the GABA<sub>A</sub> receptor appears to be important in the mediation of the immobilizing (tail clamp) but not obtunding (loss-of-righting reflex) effects of the volatile anesthetic agents enflurane and halothane. These data support the hypotheses that separate components of the anesthetic state are mediated via different central nervous system loci; that the GABA<sub>A</sub> receptor is a likely target for the immobilizing response to volatile anesthetic agents; and that the  $\beta 3$  subunit plays a direct or indirect role in the mediation of this response. Absence of the  $\beta 3$  subunit appears to attenuate the obtunding effect of midazolam and etomidate but appears not to alter the obtunding effect of pentobarbital, enflurane, and halothane, suggesting that these anesthetic agents produce hypnosis by different specific molecular mechanisms. (Key words: Benzodiazepine; enflurane; ethanol; etomidate; gene targeting; halothane; midazolam; pentobarbital.)

This article is featured in "This Month in Anesthesiology."  
Please see this issue of ANESTHESIOLOGY, page 4A.

\* Associate Professor, Department of Anesthesiology and Critical Care Medicine.

† Assistant Professor, Departments of Anesthesiology and Critical Care Medicine, Pharmacology, and Molecular Genetics and Biochemistry.

‡ Safar Professor and Chairman, Department of Anesthesiology and Critical Care Medicine.

Received from the Departments of Anesthesiology and Critical Care Medicine, Pharmacology, and Molecular Genetics and Biochemistry, University of Pittsburgh, Pittsburgh, Pennsylvania. Submitted for publication July 28, 1997. Accepted for publication November 18, 1997. Supported in part by grants AA10422 to Gregg E. Homanics and GM52035 to Leonard L. Firestone (National Institutes of Health) and by the University Anesthesiology and Critical Care Medicine Foundation.

Address reprint requests to Dr. Quinlan: C-212 Presbyterian, University of Pittsburgh Medical Center, 200 Lothrop Street, Pittsburgh, Pennsylvania 15213. Address electronic mail to: jjq@pccm46.anes.upmc.edu

SIMILAR to other members of the superfamily of ligand-gated ion channels found in the nervous system, the  $\gamma$ -aminobutyric acid type A (GABA<sub>A</sub>) receptor is a heterooligomeric protein composed of distinct polypeptide subunits.<sup>1</sup> These subunits have been grouped into several subtypes that share a high degree of amino acid sequence homology ( $\alpha 1-6$ ,  $\beta 1-3$ ,  $\gamma 1-3$ ,  $\delta$ , and  $\epsilon$ ). The identity of specific subunits found in a given receptor determines the pharmacology of that receptor; for example, the presence of the  $\alpha 6$  subunit confers a high affinity for benzodiazepine inverse agonists and a low affinity for classical benzodiazepine agonists.<sup>2</sup> Multiple sources of data implicate the GABA<sub>A</sub> receptor as a likely target of anesthetic action,<sup>3</sup> and electrophysiologic studies suggest that subunit composition conditions GABA<sub>A</sub> receptor anesthetic responses.<sup>4,5</sup> For example, pentobarbital, etomidate, and propofol induce currents in GABA receptors constructed of  $\beta 1$  or  $\beta 3$  homomers.<sup>6,7</sup> Inclusion of certain subunits can render receptors insensitive to anesthetic effects; for example, modulation



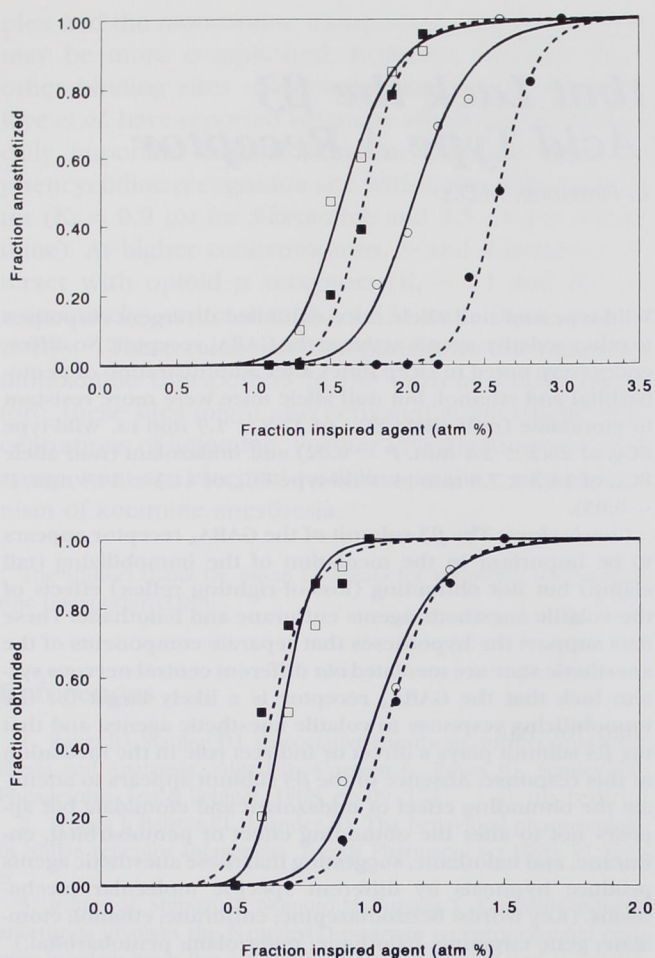

Fig. 1. Concentration–response relationship for halothane (squares) and enflurane (circles) in tail clamp (top) and loss-of-righting reflex (bottom) assays in wild-type (open symbols) and null allele (filled symbols) mice. Data were fit to a logistic equation using iterative, nonlinear regression (solid lines = wild-type mice; dotted lines = null allele mice).

of GABA-gated currents by the anesthetic neurosteroid  $3\alpha,21$ -dihydroxy- $5\alpha$ -pregnan-20-one is markedly reduced in receptors containing the  $\delta$  subunit.<sup>8</sup>

Recently, methods have been developed that permit the role of specific receptor subunits in behavioral anesthetic end points to be investigated. Specifically, the creation of mice that lack a specific gene (“null allele” or “knockout” mice, which cannot manufacture the corresponding gene product), offers a unique method to determine the importance of given GABA<sub>A</sub> receptor subunits to specific anesthetic responses. We recently created mice that lack the  $\beta 3$  subunit of the GABA<sub>A</sub> receptor.<sup>9</sup> The  $\beta 3$  subunit is widely expressed throughout the mammalian central nervous system, and there-

fore receptors that incorporate it are a likely target for anesthetic action. We compared the sensitivity of  $\beta 3$  null allele and wild-type mice to the obtunding and immobilizing actions of the volatile anesthetic agents enflurane and halothane and to the hypnotic effects of pentobarbital, ethanol, etomidate, and midazolam to determine whether this subunit is important to the actions of these anesthetic agents.

## Materials and Methods

This work was approved by the animal care and use committee at the University of Pittsburgh (Pittsburgh, PA). Mice that lack the genes for the  $\beta 3$  subunit of the GABA<sub>A</sub> receptor (strain designation *Gabrb3*<sup>tm1Geh</sup>) were created as previously described.<sup>9</sup> The  $\beta 3$  gene was disrupted by homologous recombination in mouse embryonic stem cells. The disrupted  $\beta 3$  gene was transmitted through the germ cell line, ultimately resulting in the production of wild-type ( $\beta 3$  +/+), heterozygous ( $\beta 3$  +/-), and null allele ( $\beta 3$  -/-) mice. Northern blot analysis confirmed that the disrupted  $\beta 3$  gene was not functional; the  $\beta 3$  protein was absent, and the  $\beta 3$  messenger ribonucleic acid was absent in null allele mice but present at 70% of wild-type levels in heterozygotes.

### Volatile Agents

Halothane and enflurane requirements in adult mice were determined by using the end points of loss-of-righting reflex<sup>10</sup> and tail clamp/withdrawal.<sup>11</sup> For loss-of-righting reflex, mice were placed in individual wire mesh cages in a rotating carousel in a sealed acrylic chamber. Carbon dioxide tension (maintained at < 1 atm %) and rectal temperature (maintained at  $36.5 \pm 1.0^\circ\text{C}$ ) were controlled to avoid effects on anesthetic requirement.<sup>12,13</sup> The atmosphere of the chamber was equilibrated for 15 min with a chosen concentration of halothane (atm %) or enflurane (atm %), confirmed by piezoelectric analysis (Siemens 120, Danvers, MA). A blinded observer scored the mice for loss-of-righting reflex in a quantal fashion, after which mice were allowed to recover in air for 30 min before a new trial. An enclosed chamber with similar characteristics was used to determine response to tail clamp. After equilibration at a given anesthetic concentration for 15 min, mice were scored in a quantal fashion by a blinded examiner for an organized motor withdrawal in response to clamping the tail, before recovery for 30 min and assay at another anesthetic concentration.



ANESTHESIA RESPONSES IN  $\beta 3$  SUBUNIT-DEFICIENT MICETable 1. Anesthetic Requirement in Mice with and without the  $\beta 3$  GABA<sub>A</sub> Receptor Subunit

| Genotype          | n (M/F)    | Age (range)<br>(wk) | Anesthetic | EC <sub>50</sub> (atm % ± SE) | Slope (±SE) |
|-------------------|------------|---------------------|------------|-------------------------------|-------------|
| <b>Tail clamp</b> |            |                     |            |                               |             |
| $\beta 3$ +/+     | 13 (5/8)   | 10.6 (11–16)        | Enflurane  | 2.06 ± 0.12                   | 11.1 ± 2.8  |
| $\beta 3$ +/-     | 11 (9/2)   | 13.2 (10–20)        | Enflurane  | 2.21 ± 0.05                   | 19.8 ± 5.2  |
| $\beta 3$ -/-     | 12 (2/10)  | 14.5 (8–20)         | Enflurane  | 2.59 ± 0.10*                  | 20.5 ± 5.6  |
| $\beta 3$ +/+     | 20 (10/10) | 11.5 (8–16)         | Halothane  | 1.59 ± 0.05                   | 9.6 ± 1.8   |
| $\beta$ +/-       | 15 (7/8)   | 12.1 (9–16)         | Halothane  | 1.80 ± 0.05†                  | 15.5 ± 3.8  |
| $\beta 3$ -/-     | 23 (10/13) | 11.3 (8–17)         | Halothane  | 1.73 ± 0.04‡                  | 14.0 ± 2.5  |
| <b>LORR</b>       |            |                     |            |                               |             |
| $\beta 3$ +/+     | 23 (14/9)  | 12.1 (9–14)         | Enflurane  | 1.03 ± 0.06                   | 9.4 ± 1.8   |
| $\beta 3$ -/-     | 15 (5/10)  | 10.5 (7–13)         | Enflurane  | 1.08 ± 0.07                   | 11.7 ± 2.6  |
| $\beta 3$ +/+     | 20 (15/5)  | 10.2 (9–13)         | Halothane  | 0.68 ± 0.04                   | 12.2 ± 2.7  |
| $\beta 3$ -/-     | 8 (2/6)    | 9.1 (8–10)          | Halothane  | 0.64 ± 0.07                   | 8.3 ± 2.5   |

GABA =  $\gamma$ -aminobutyric acid; LORR = loss of righting reflex.

\*  $P < 0.001$ , null allele versus wild type.

†  $P = 0.001$ , heterozygote versus wild type.

‡  $P = 0.01$ , null allele versus wild type.

### Intravenous Agents

Sleep time (duration of the loss-of-righting reflex) was determined after intraperitoneal injection of pentobarbital (45 mg/kg), ethanol (3.5 mg/g), etomidate (20 mg/kg), or midazolam (60 mg/kg) as previously described.<sup>14</sup> Temperature was controlled and measured in a manner similar to the loss-of-righting reflex and tail clamp assays.

Concentration-response data for loss-of-righting reflex and tail clamp/withdrawal were fit to a logistic equation, yielding half-effect concentrations (EC<sub>50</sub>), slopes, and estimates of their respective standard errors.<sup>15</sup> Null allele, heterozygous, and wild-type group responses were compared statistically by referring the variance ratio to a standard normal distribution.<sup>16</sup> Mean sleep times for each agent were compared in null allele and wild-type mice using an unpaired *t* test.

### Results

The slopes of the concentration-response curves for tail clamp and loss-of-righting reflex with enflurane and halothane were statistically indistinguishable among the three groups, allowing valid comparisons of the EC<sub>50</sub> values. The EC<sub>50</sub> value for enflurane tail clamp in wild-type mice was similar to previously published values, whereas that for halothane was slightly higher than previous reports.<sup>11,17</sup> Null allele mice were significantly more resistant to enflurane and halothane (table 1 and fig. 1). The magnitude of the difference in sensitivity

was almost three times greater for enflurane (EC<sub>50</sub> in null allele mice was 26% greater than in wild-type mice) than for halothane (EC<sub>50</sub> in null allele mice was 9% greater than in wild-type mice). Heterozygous mice exhibited an intermediate value for enflurane but were similar to null allele mice in their response to halothane (table 1). Median effective concentrations for loss-of-righting reflex with enflurane and halothane in wild-type mice were also similar to previously published values,<sup>11</sup> but null allele mice did not differ in their sensitivities to the two volatile agents in this assay (table 1 and fig. 1). The ratio of potency of enflurane in the loss-of-righting reflex and tail clamp assays for wild-type animals was almost identical to that previously reported.<sup>11</sup>

Although the sleep times of null allele and wild-type mice after administration of pentobarbital and ethanol were almost identical, null allele mice were significantly more resistant to etomidate and midazolam (table 2). The magnitude of the difference in sleep time was approximately twice as great with midazolam (65% less than in wild-type mice) than with etomidate (32% less than in wild-type mice).

### Discussion

As we have previously reported, many mice lacking the  $\beta 3$  GABA receptor subunit gene have major abnormalities in craniofacial development and die as neonates. Null allele mice that survive behave abnormally,



**Table 2. Sleep Time in Mice with and without the  $\beta 3$  GABA<sub>A</sub> Receptor Subunit**

| Agent         | Genotype      | n (M/F)   | Age (range) (wk) | Sleep Time (min) (mean $\pm$ SE) |
|---------------|---------------|-----------|------------------|----------------------------------|
| Pentobarbital | $\beta 3$ +/+ | 19 (8/11) | 15.4 (8–20)      | 38.5 $\pm$ 2.8                   |
|               | $\beta$ -/-   | 17 (6/11) | 20.2 (15–28)     | 43.8 $\pm$ 3.9                   |
| Ethanol       | $\beta 3$ +/+ | 25 (8/17) | 12.7 (7–17)      | 58.1 $\pm$ 7.1                   |
|               | $\beta 3$ -/- | 28 (9/19) | 13.5 (8–18)      | 60.1 $\pm$ 5.9                   |
| Midazolam     | $\beta 3$ +/+ | 11 (3/8)  | 14.9 (11–22)     | 41.3 $\pm$ 10.4*                 |
|               | $\beta 3$ -/- | 12 (5/7)  | 15.9 (11–20)     | 14.2 $\pm$ 7.8*                  |
| Etomidate     | $\beta 3$ +/+ | 12 (9/16) | 18.4 (11–24)     | 26.2 $\pm$ 2.4†                  |
|               | $\beta 3$ -/- | 15 (5/10) | 18.7 (12–24)     | 17.8 $\pm$ 1.9†                  |

GABA =  $\gamma$ -aminobutyric acid.

\*  $P < 0.05$ , null allele versus wild type.

†  $P < 0.02$ , null allele versus wild type.

exhibiting hyperactivity, incoordination, and epilepsy.<sup>9</sup> Lack of the  $\beta 3$  gene is accompanied by grossly abnormal electroencephalographic activity and a marked reduction in the number of GABA<sub>A</sub> receptors, suggesting that the  $\beta 3$  subunit is crucial in the assembly process for receptors and cannot simply be replaced by other available subunits.<sup>9</sup> The  $\beta 3$  subunit is normally a frequent constituent of the GABA<sub>A</sub> receptor throughout the nervous system (especially in the cerebral cortex, hypothalamus, cranial nerve ganglia, and spinal cord),<sup>18,19</sup> and several lines of evidence suggest that its presence in a receptor may confer distinct pharmacologic properties. GABA<sub>A</sub> receptors containing  $\beta 3$  subunits have a threefold greater affinity for GABA than do receptors with  $\beta 1$  or  $\beta 2$  subunits<sup>20</sup>; however, individual  $\beta$  subunits seem to differ little in their modulation by benzodiazepines, barbiturates, or steroids, at least when transiently expressed with  $\alpha$  and  $\gamma$  subunits.<sup>20</sup> The mice in the current study, which lack  $\beta 3$  subunits, offer a unique opportunity to investigate the role of these subunits in the behavioral end points of anesthetic action.

The absence of a difference in the potency of enflurane and halothane in the loss-of-righting reflex assay, in the face of a significant difference in the tail clamp assay, suggests that the  $\beta 3$  subunit is important in the mediation of the immobilizing but not the hypnotic response to volatile agents. These data agree with recent data suggesting that separate elements of the anesthetic state are produced by different mechanisms. For example, anesthetic agents vary widely in the ratio of potency in producing amnesia to potency as surgical anesthetic agents,<sup>21</sup> and certain lipid-soluble volatile anesthetic agents predicted to act as such by the Meyer-Overton hypothesis fail to act as surgical anesthetic agents, yet can produce amnesia.<sup>22</sup> Such data support

the hypothesis that anesthetic agents produce immobility and amnesia by disparate mechanisms or neural pathways; immobility may be mediated at a site possessing polar and nonpolar properties, such as an aqueous-protein interface of a membrane-bound receptor, whereas amnesia is produced at a nonpolar site.<sup>23</sup> Such a hypothesis predicts that the GABA<sub>A</sub> receptor is a more likely anesthetic target for the immobilizing response to a surgical stimulus than for the amnestic or sedative responses, as volatile anesthetic agents have their maximum effects on GABA<sub>A</sub> receptors at concentrations producing immobility.<sup>23</sup> Our data support the concept that the GABA<sub>A</sub> receptor is a likely target for the immobilizing response and suggest that the  $\beta 3$  subunit may be important in this process, because of a direct interaction of volatile agents with GABA<sub>A</sub> receptor isoforms that contain the  $\beta 3$  subunit, a marked general decrease in GABA-mediated inhibition associated with  $\beta 3$  gene inactivation, or differences in neuronal circuitry due to development in the absence of the  $\beta 3$  subunit. Because an analgesic component is integral to the tail clamp response, it is possible that the null allele mice have an altered threshold to pain, suggesting a role for  $\beta 3$ -containing subunits in neuronal analgesic pathways. We are currently collaborating on studies to examine pain responses in mice lacking the  $\beta 3$  subunit. Further, the lack of a difference in the obtunding response as measured by the loss-of-righting reflex suggests that sedation by volatile anesthetic agents may be mediated at another site, similar to the amnestic response. Determining whether these wild-type and null allele mice differ in their amnestic response to volatile anesthetic agents would be a useful test of this "separate mechanisms" hypothesis.

The divergence in the sleep time response of the null



allele and wild-type mice to midazolam and etomidate versus pentobarbital, ethanol, and the volatile agents is unexpected because these agents are all believed to share the GABA<sub>A</sub> receptor as an important pharmacologic target. Although sensitivity to ethanol and pentobarbital are not correlated in heterogenous stock mice,<sup>24</sup> sensitivity to these drugs in lines of rodents bred for sensitivity to ethanol or diazepam has been parallel; *i.e.*, mice bred for sensitivity to ethanol were also sensitive to pentobarbital, benzodiazepines, and volatile anesthetic agents,<sup>14,25</sup> whereas mice bred for sensitivity to diazepam were also sensitive to ethanol, pentobarbital, and volatile anesthetic agents.<sup>10,26</sup> The current data suggest that these agents interact differently with receptors that possess or lack the  $\beta 3$  subunit. Absence of the  $\beta 3$  subunit appears to attenuate the obtunding effect of midazolam and etomidate but appears to have no result on the obtunding effects of pentobarbital, ethanol, enflurane, and halothane. Although there are few electrophysiologic data to suggest  $\beta$  subunit dependence of midazolam action, the efficacy of etomidate in the direct activation of chloride currents and modulation of GABA-evoked chloride currents of recombinant human GABA receptors shows a rank order of  $\beta$  subunit dependence of  $\beta 3 > \beta 2 >>> \beta 1$ .<sup>27</sup> Because etomidate is most efficacious at  $\beta 3$ -containing subunits, one might predict a higher etomidate requirement in their absence. Although we cannot exclude a pharmacokinetic basis for the difference in sleep times with midazolam and etomidate, this explanation seems unlikely because the mice share the same genetic background for all the enzymatic processes vital to drug inactivation and excretion.

In contrast to the  $\alpha 6$  subunit of the GABA<sub>A</sub> receptor, whose absence does not change the anesthetic requirement for enflurane,<sup>28</sup> the  $\beta 3$  subunit of the GABA receptor seems to be involved integrally in the immobilizing response to volatile anesthetic agents. A lack of effect of the absence of the  $\beta 3$  subunit on the obtunding response to volatile anesthetic agents, pentobarbital, and ethanol, together with significant resistance to the obtunding effect of midazolam and etomidate, supports the hypothesis that anesthetic agents may modulate the GABA<sub>A</sub> receptor at separate sites *via* separate mechanisms of action, which depend on the composition of receptor subunits. Future studies using conditional  $\beta 3$  null allele mice may allow the brain regions most relevant to these mechanisms to be identified.

The authors thank Carolyn Ferguson and Nam Le for their expert technical assistance.

## References

- Olsen RW, Tobin AJ: Molecular biology of GABA<sub>A</sub> receptors. *FASEB J* 1990; 4:1469-80
- Lüddens H, Pritchett DB, Kohler M, Killisch I, Keinänen K, Monyer H, Sprengel R, Seeburg PH: Cerebellar GABA<sub>A</sub> receptor selective for a behavioural alcohol antagonist. *Nature* 1990; 346:648-51
- Tanelian DL, Kosek P, Mody I, MacIver MB: The role of the GABA<sub>A</sub> receptor/chloride channel complex in anesthesia. *ANESTHESIOLOGY* 1993; 78:757-76
- Firestone LL, Quinlan JJ, Homanics GE: The role of  $\gamma$ -aminobutyric acid type-A receptor subtypes in the pharmacology of general anesthesia. *Curr Opin Anaesth* 1995; 8:311-4
- Harris RA, Mihic SJ, Dildy-Mayfield JE, Machu TK: Actions of anesthetics on ligand-gated ion channels: Role of receptor subunit composition. *FASEB J* 1995; 9:1454-62
- Cestari IN, Uchida I, Li L, Burt D, Yang J: The agonistic action of pentobarbital on GABA<sub>A</sub> beta-subunit homomeric receptors. *Neuroreport* 1996; 7:943-7
- Sanna E, Garau F, Harris RA: Novel properties of homomeric  $\beta 1$   $\gamma$ -aminobutyric acid type A receptors: Actions of the anesthetics propofol and pentobarbital. *Mol Pharmacol* 1995; 47:213-7
- Zhu WJ, Wang JF, Krueger KE, Vicini S:  $\delta$  subunit inhibits neurosteroid modulation of GABA<sub>A</sub> receptors. *J Neurosci* 1996; 16:6648-56
- Homanics GE, DeLorey TM, Firestone LL, Quinlan JJ, Handforth A, Harrison NL, Krasowski MD, Rick CEM, Korpi ER, Mäkelä R, Brilliant MH, Hagiwara N, Ferguson C, Snyder K, Olsen RW: Mice devoid of  $\gamma$ -aminobutyrate type A receptor  $\beta 3$  subunit have epilepsy, cleft palate, and hypersensitive behavior. *Proc Natl Acad Sci U S A* 1997; 94:4143-8
- Quinlan JJ, Jin K, Gallaher EJ, McCrae AF, Firestone LL: Halothane sensitivity in replicate mouse lines selected for diazepam sensitivity or resistance. *Anesth Analg* 1994; 79:927-32
- Deady JE, Koblin DD, Eger EI II, Heavener JE, D'Aouost B: Anesthetic potencies and the unitary theory of narcosis. *Anesth Analg* 1981; 60:380-4
- Eisele JH, Eger EI II, Muallem M: Narcotic properties of carbon dioxide in the dog. *ANESTHESIOLOGY* 1967; 28:856-65
- Eger EI II, Saidman IJ, Brandstater B: Temperature dependence of halothane and cyclopropane anesthesia in dogs: Correlation with some theories of anesthetic action. *ANESTHESIOLOGY* 1965; 26:764-70
- Marley RJ, Miner LL, Wehner JM, Collins AC: Differential effects of central nervous system depressants in long-sleep and short-sleep mice. *J Pharmacol Exp Ther* 1986; 238:1028-33
- Waud DR: On biological assays involving quantal responses. *J Pharmacol Exp Ther* 1972; 183:577-607
- Alifimoff JK, Firestone LL, Miller KW: Anesthetic potencies of secondary alcohol enantiomers. *ANESTHESIOLOGY* 1987; 66:55-9
- Mazze RI, Rice SA, Baden JM: Halothane, isoflurane, and enflurane MAC in pregnant and nonpregnant female and male mice and rats. *ANESTHESIOLOGY* 1985; 62:339-41
- Laurie DJ, Wisden W, Seeburg PH: The distribution of thirteen GABA<sub>A</sub> receptor subunit mRNAs in the rat brain: III. Embryonic and postnatal development. *J Neurosci* 1992; 12:4151-72
- Wisden W, Laurie DJ, Monyer H, Seeburg PH: The distribution of 13 GABA<sub>A</sub> receptor subunit mRNAs in the rat brain: I. Telencephalon, diencephalon, mesencephalon. *J Neurosci* 1992; 12:1040-62
- Hadingham KL, Wingrove PB, Wafford KA, Bain C, Kemp JA, Palmer KJ, Wilson AW, Wilcox AS, Sikela J, Ragan CI, Whiting PJ:



Role of the beta subunit in determining the pharmacology of human gamma-aminobutyric acid type A receptors. *Mol Pharmacol* 1993; 44:1211-8

21. Dwyer R, Bennett HL, Eger EI II, Heilbron D: Effects of isoflurane and nitrous oxide in subanesthetic concentrations on memory and responsiveness in volunteers. *ANESTHESIOLOGY* 1992; 77:888-98

22. Kandel L, Chortkoff BS, Sonner J, Laster MJ, Eger EI II: Nonanesthetics can suppress learning. *Anesth Analg* 1996; 82:321-6

23. Eger EI II, Koblin DD, Harris RA, Kendig JJ, Pohorille A, Halsey MJ, Trudell JR: Hypothesis inhaled anesthetics produce immobility and amnesia by different mechanisms at different sites. *Anesth Analg* 1997; 84:915-8

24. Allan AM, Harris RA: Sensitivity to ethanol hypnosis and modulation of chloride channels does not cosegregate with pentobarbital sensitivity in HS mice. *Alcoholism Clin Exp Res* 1989; 13:428-34

25. Koblin DD, Deady JE: Anaesthetic requirement in mice selectively bred for differences in ethanol sensitivity. *Br J Anaesth* 1982; 53:5-10

26. Phillips TJ, Gallaher EJ: Locomotor responses to benzodiazepines, barbiturates and ethanol in diazepam-sensitive (DS) and -resistant (DR) mice. *Psychopharmacology* 1992; 107:125-31

27. Sanna E, Murgia A, Casula A, Biggio G: Differential subunit dependence of the actions of the general anesthetics alphaxalone and etomidate at  $\gamma$ -aminobutyric acid type A receptors expressed in *Xenopus laevis* oocytes. *Mol Pharmacol* 1997; 51:484-90

28. Homanics GE, Ferguson C, Quinlan JJ, Daggett J, Snyder K, Lagenaur C, Mi Z, Wang X, Grayson DR, Firestone LL: Gene knockout of the  $\alpha 6$  subunit of the  $\gamma$ -aminobutyric acid type A receptor: Lack of effect on responses to ethanol, pentobarbital, and general anesthetics. *Mol Pharmacol* 1997; 51:588-96
